# Supplementary material for: Continuous synthesis of elastomeric macroporous microbeads
Source: Royal Society of Chemistry journal article supplement (doi:10.1039/c8re00189h), 2018-11-09
Supplement: c8re00189h3.pdf [file c8re00189h3.pdf]

## SUPPORTING INFORMATION

### Continuous Synthesis of Elastomeric Macroporous Microbeads

Jeffrey A. Bennett, Zachary S. Campbell, and Milad Abolhasani\*

*North Carolina State University, Department of Chemical and Biomolecular Engineering, Raleigh, NC USA*

E-mail: [abolhasani@ncsu.edu](mailto:abolhasani@ncsu.edu)

Webpage: [www.abolhasanilab.com](http://www.abolhasanilab.com)

#### S1-Flow-Focusing Microreactor

Figure S1 shows the schematic of the off-the-shelf fittings, capillaries, and fluidic connections utilized for constructing the coaxial flow-focusing microreactor.

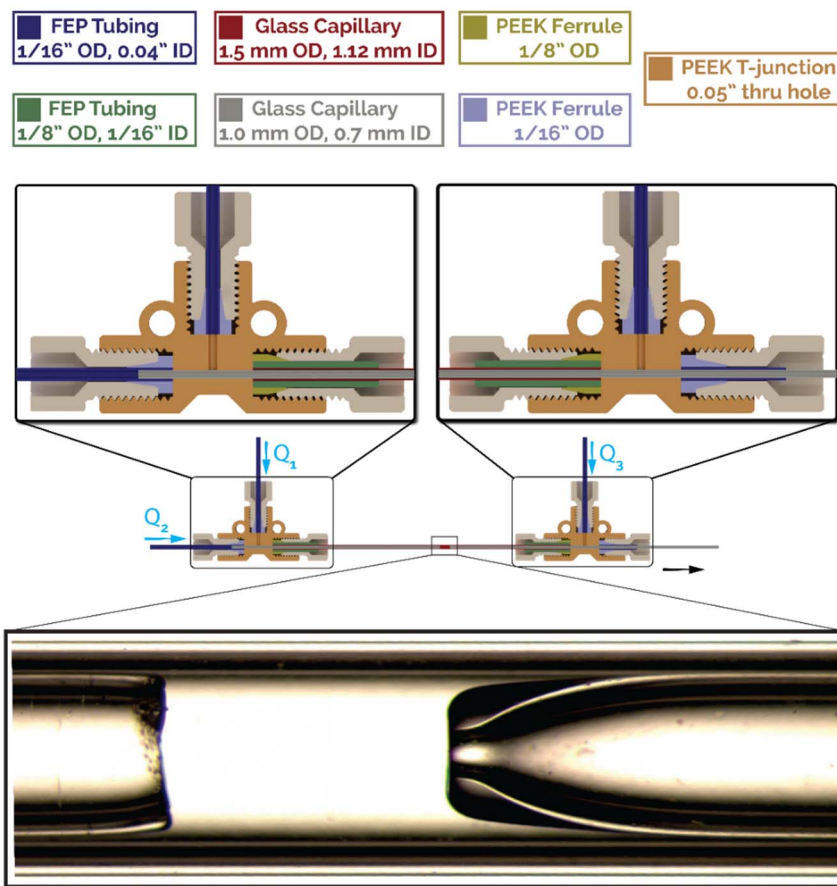

**Figure S1.** The capillary-based flow focusing microreactor constructed using off-the-shelf components. The bottom inset shows a bright-field image of the coaxial inner capillaries inserted inside the outer capillary.

Inlet-side T-junction (Left) connections listed clockwise from the left:

**Polymer/crosslinker inlet line:** 1 mm OD  $\times$  0.75 mm ID  $\times$  4 cm long inner glass capillary inserted into 1/16'' OD 0.04'' ID FEP tubing and threaded through the long axis of the T-junction.

**Solvent/catalyst inlet line:** 1/16'' OD FEP tubing connected to the perpendicular inlet of the T-junction.

**Outlet of first T-junction:** 1.5 mm OD  $\times$  1.12 mm ID  $\times$  6 cm long outer glass capillary with 1/8'' OD  $\times$  1/16'' ID Tygon sleeve fastened coaxially around inner capillary as it protrudes from the outlet of the T-junction.

Outlet side T-junction (Right) connections listed clockwise from the left:

**Inlet of second T-junction:** Other end of 1.5 mm OD  $\times$  1.12 mm ID  $\times$  6 cm long outer glass capillary with another 1/8'' OD  $\times$  1/16'' ID Tygon sleeve to fasten to the long axis of the outlet T-junction.

**Continuous phase inlet line:** 1/16'' OD FEP tubing connected to the perpendicular inlet of the T-junction.

**Reactor outlet:** 1 mm OD  $\times$  0.75 mm ID  $\times$  10 cm long flamed-tip glass capillary with 1/16'' OD 0.04'' ID FEP sleeve fastened such that the two inner capillaries are separated by  $\sim$  1.5 mm.

## S2-Non-Porous Microbeads (Control)

Figure S2 shows the high degree of monodispersity obtained for the crosslinked non-porous PHMS microbeads (3:1 PHMS:hexadiene ratio) synthesized using the capillary-based microfluidic platform described in the paper.

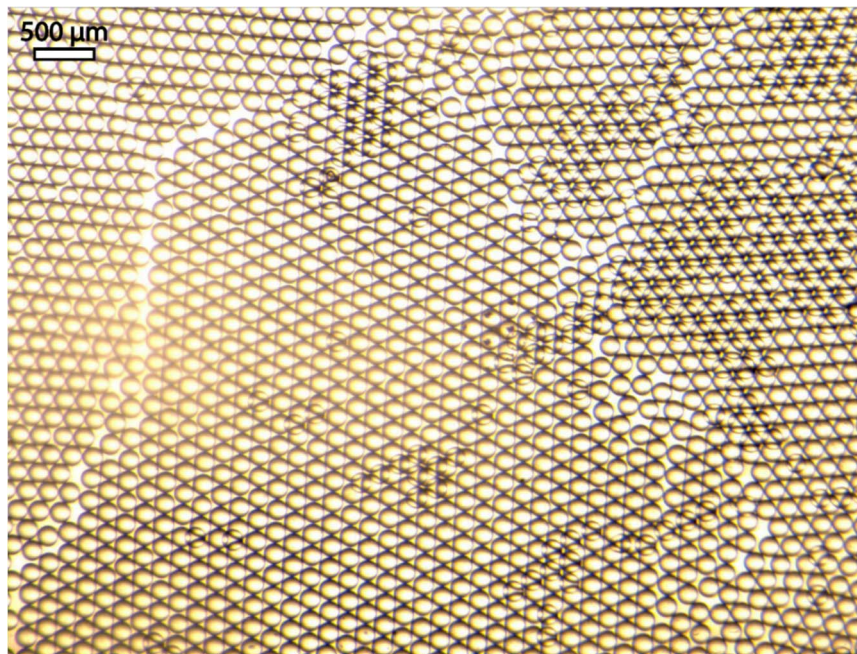

**Figure S2.** Bright-field monolayer image of the PHMS microbeads synthesized using the developed 3D flow-focusing microreactor with PHMS:hexadiene ratio of 3:1.

### S3-Silica-Loaded PHMS Microbeads

Figure S3 shows the high degree of monodispersity obtained for the (crosslinked) silica-loaded PHMS microbeads (5  $\mu\text{m}$  silica microspheres, 5:1 PHMS:hexadiene ratio) synthesized using the capillary-based microfluidic platform described in the paper.

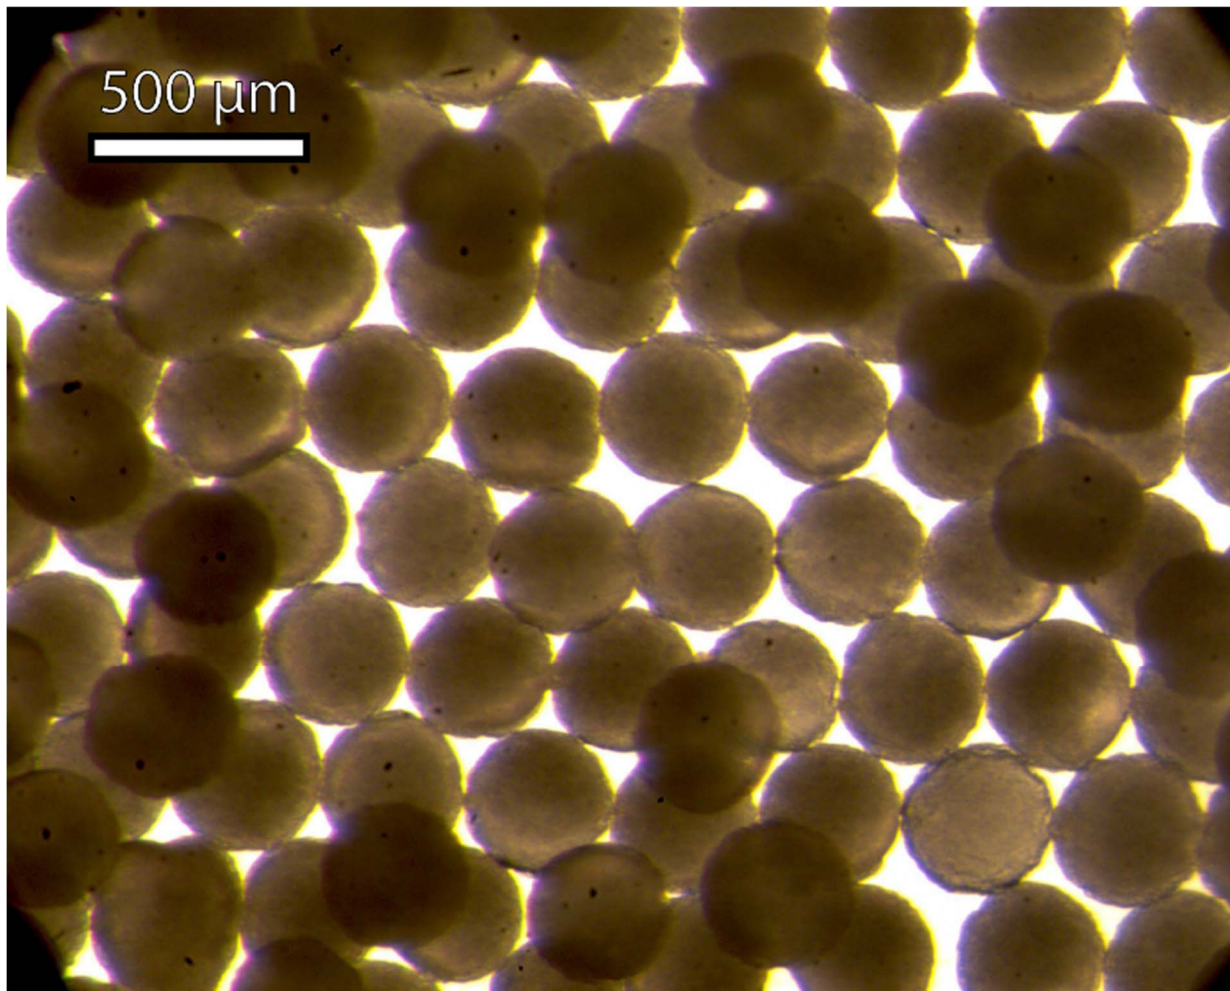

**Figure S3.** Bright-field monolayer image of the silica-loaded PHMS microbeads synthesized using the developed 3D flow-focusing microreactor with 5 $\mu\text{m}$  silica microspheres and PHMS:hexadiene ratio of 5:1.

#### S4-Example Rheometer Compression Data

Figure S4 shows an example of data obtained for a non-porous PHMS microbead (control) from the compression test using the rheometer in parallel plate configuration.

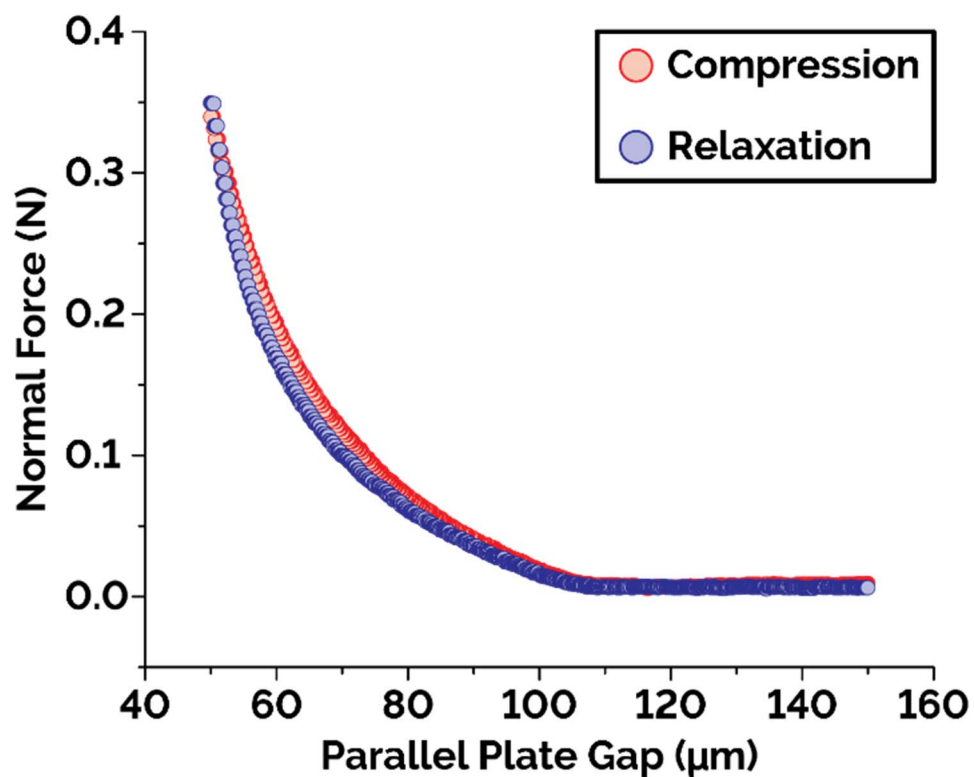

**Figure S4.** Measured normal force vs. the parallel plate gap for an in-flow synthesized dense PHMS microbead with PHMS:hexadiene ratio of 3:1. The overlay of the compression/relaxation curves demonstrate the elasticity of the PHMS microbeads without hysteresis.

## Supplementary Videos:

**Video M-1** The droplet production videos of the flow-focusing microreactor for a porogen-free control and a silica-loaded test using a high-speed camera. Porogen-free flow parameters:  $Q_1 = 10 \mu\text{L}/\text{min}$ ,  $Q_2 = 5 \mu\text{L}/\text{min}$ , and  $Q_3 = 200 \mu\text{L}/\text{min}$  with 5:1 PHMS:hexadiene ratio. Silica-loaded flow parameters:  $Q_1 = 10 \mu\text{L}/\text{min}$ ,  $Q_2 = 10 \mu\text{L}/\text{min}$ , and  $Q_3 = 200 \mu\text{L}/\text{min}$  with 5:1 PHMS:hexadiene ratio and  $10 \mu\text{m}$  silica microspheres.

**Video M-2** Reconstructed MicroCT volume renderings of multiple microbeads and single microbead sweep cut for the silica-loaded and macroporous PHMS microbeads. Microbeads were produced using  $Q_1 = 10 \mu\text{L}/\text{min}$ ,  $Q_2 = 10 \mu\text{L}/\text{min}$ , and  $Q_3 = 300 \mu\text{L}/\text{min}$  with 5:1 PHMS:hexadiene ratio and  $5 \mu\text{m}$  silica microspheres.
